# Supplementary material
Source: PubMed Central journal article supplement (PMC9076549)
Supplement: mmc1.pdf [file mmc1.pdf]

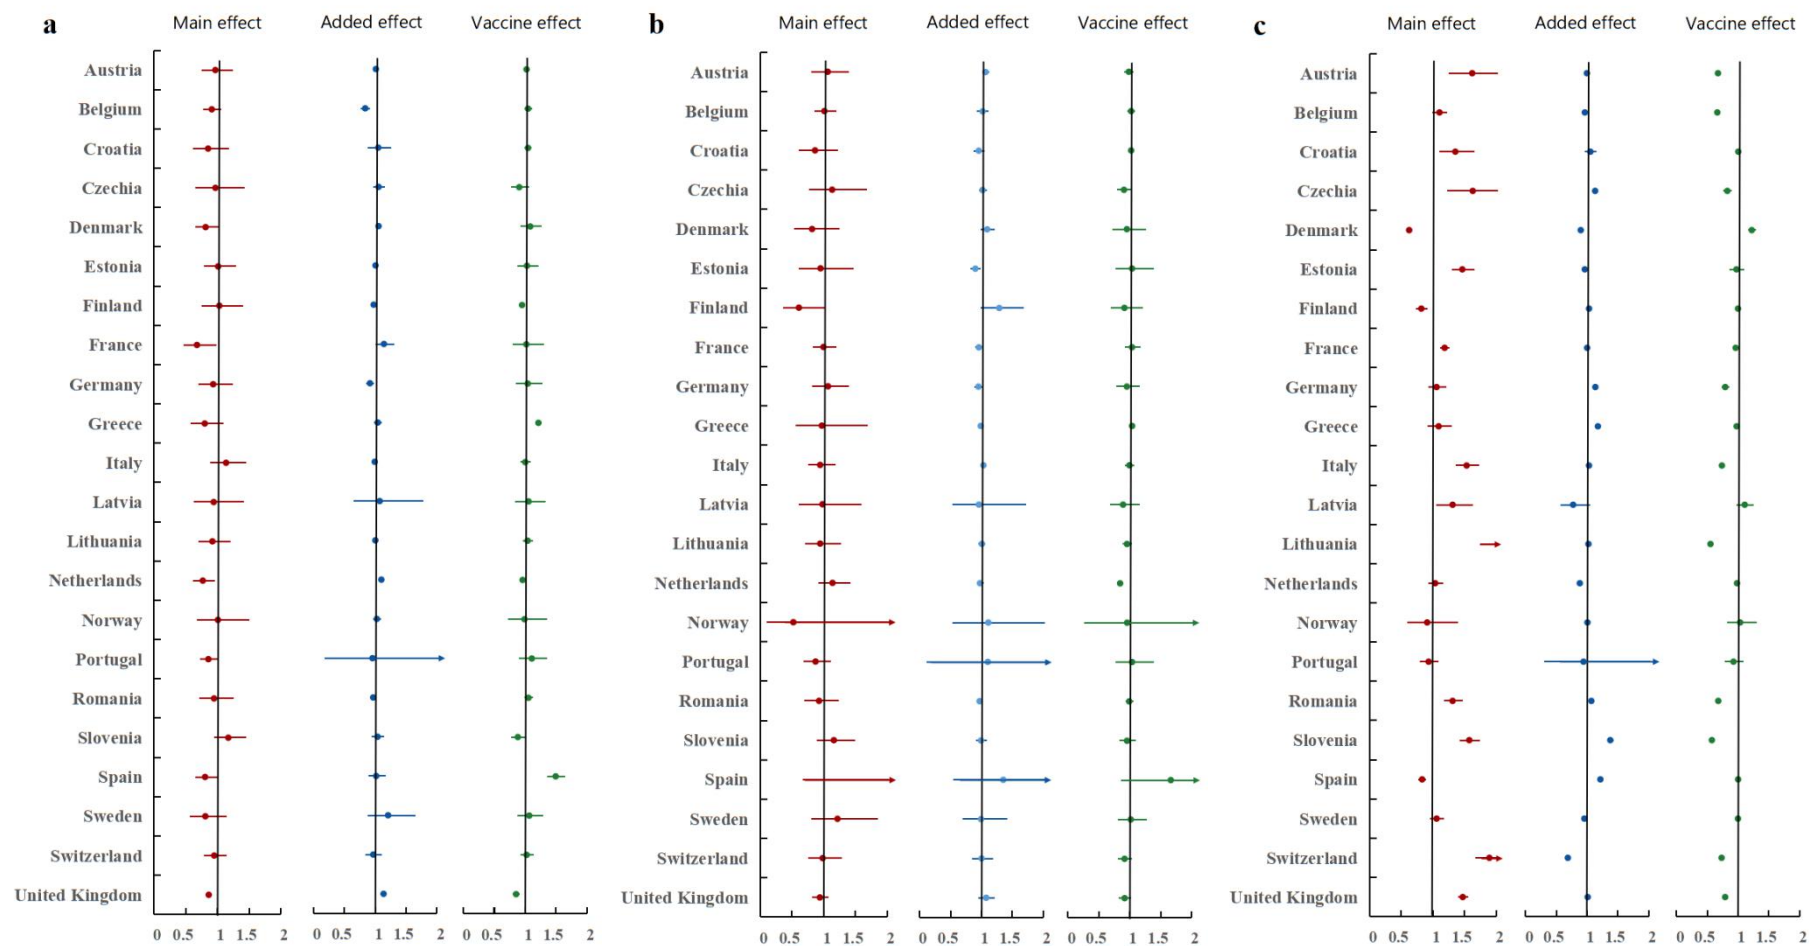

Figure S1. Main, added and vaccine effects for three outcomes in 22 countries under the strict intervention (above 80th percentile and lasts at least 21 days) after the vaccination rollouts during pandemic. (a) case growth rate, (b) death growth rate, (c) excess mortality.

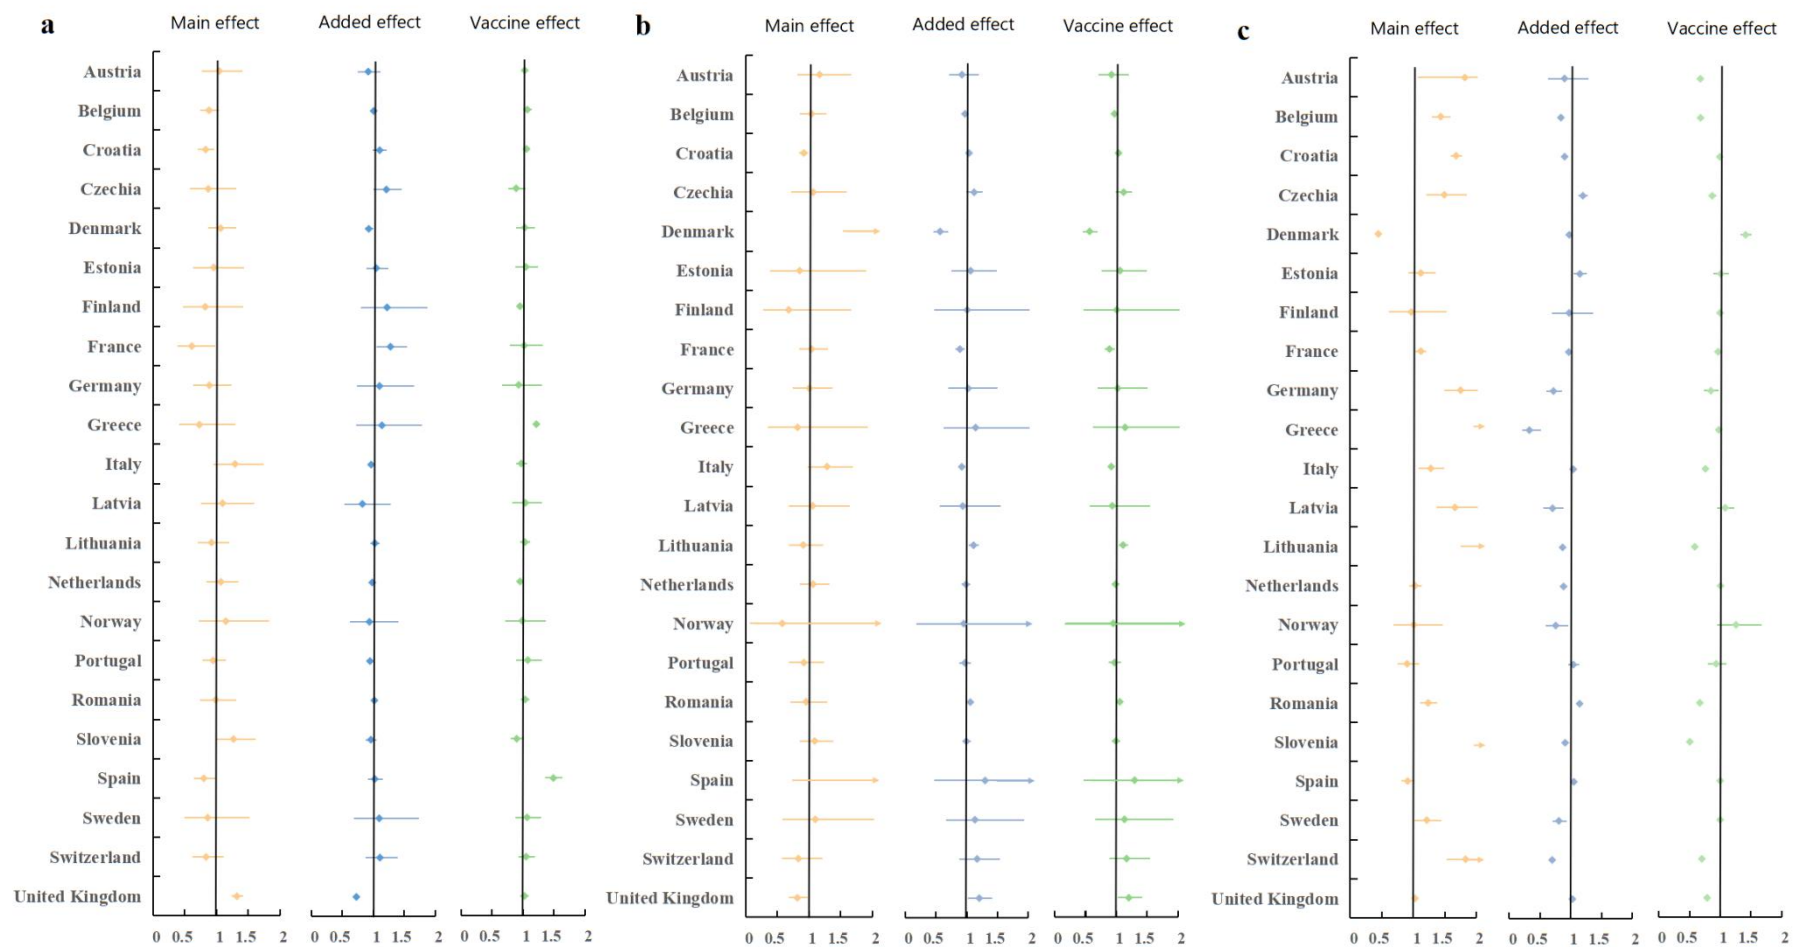

Figure S2. Main, added and vaccine effects for three outcomes in 22 countries under the weak intervention (above 60th percentile and lasts at least 7 days) after the vaccination rollouts during pandemic. (a) case growth rate, (b) death growth rate, (c) excess mortality.
